# Supplementary material for: Healable and shape editable supercapacitors based on shape memory polyurethanes
Source: Royal Society of Chemistry journal article supplement (doi:10.1039/c9ta04673a), 2019-01-01
Supplement: c9ta04673a1.pdf [file c9ta04673a1.pdf]

Electronic Supplementary Information for

**Healable and Shape Editable Supercapacitors Based on Shape Memory  
Polyurethanes**

Tianqi Li, Xu Fang, Qiang Pang, Weimin Huang, and Junqi Sun\*

State Key Laboratory of Supramolecular Structure and Materials, College of  
Chemistry, Jilin University, Changchun 130012, People's Republic of China

\*Corresponding authors. E-mail: sun\_junqi@jlu.edu.cn

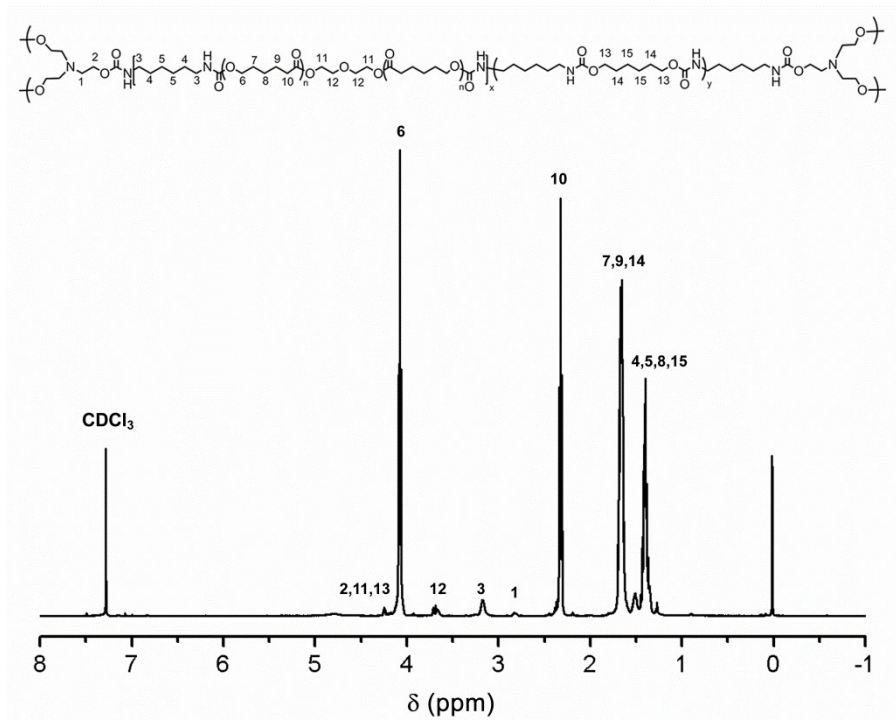

**Fig. S1**  $^1\text{H}$  NMR spectrum ( $\text{CDCl}_3$ ) of PU network.

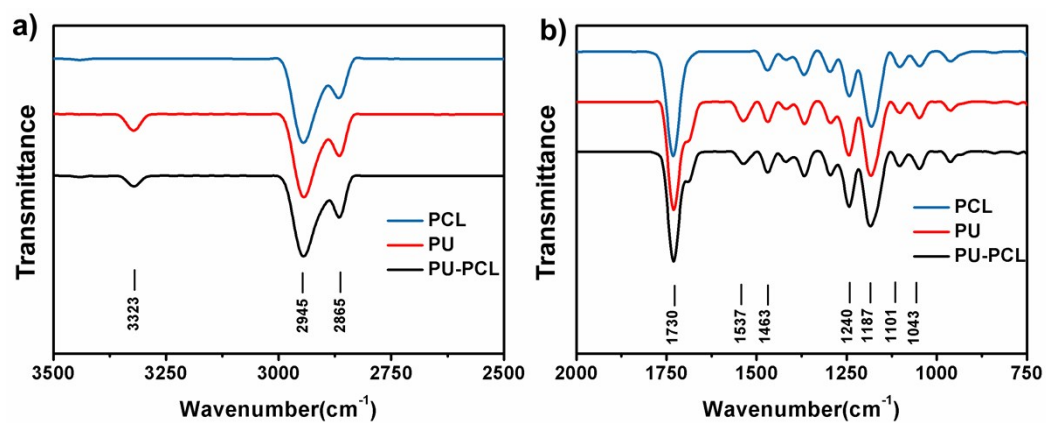

**Fig. S2** FTIR spectra of liner PCL, PU and PU-PCL. The following characteristic peaks confirm the chemical structures:  $3323\text{ cm}^{-1}$  ( $\nu(-\text{NH}-)$ ),  $2945$  and  $2865\text{ cm}^{-1}$  ( $\nu(\text{CH}_3, \text{CH}_2)$ ),  $1730\text{ cm}^{-1}$  ( $\nu_{\text{as}}(\text{C}=\text{O})$ ),  $1537\text{ cm}^{-1}$  ( $\delta(\text{C}-\text{N}-\text{H})$ ),  $1463\text{ cm}^{-1}$  ( $\delta(\text{CH}_2)$ ),  $1240$  and  $1101\text{ cm}^{-1}$  ( $\nu(\text{C}-\text{O}-\text{C})$ ),  $1043\text{ cm}^{-1}$  ( $\delta(\text{C}-\text{O}-\text{C})$ ),  $1187\text{ cm}^{-1}$  ( $\nu(\text{OC}-\text{O})$ ).

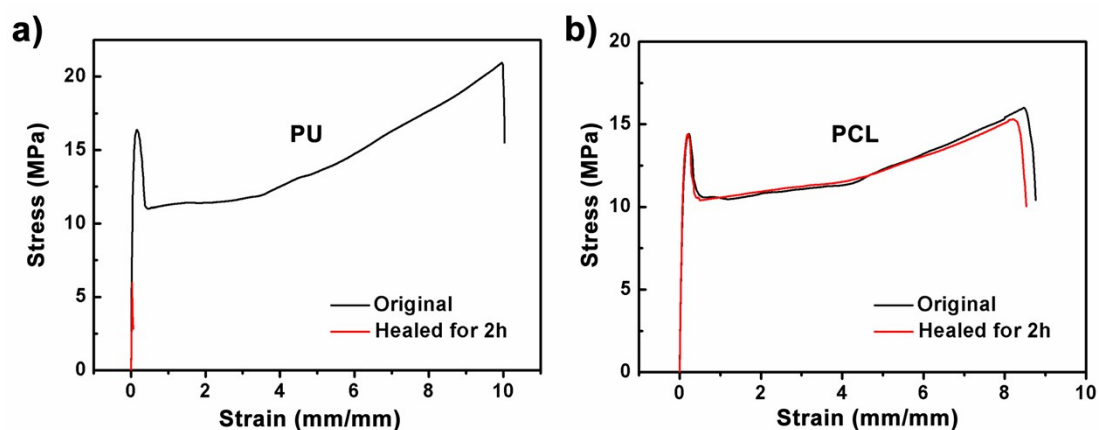

**Fig. S3** (a) Stress-strain curves of the original and 2 h recontacted PU network samples that were previously cut into two pieces. (b) Stress-strain curves of the original and 2 h healed liner PCL samples that were previously cut into two pieces.

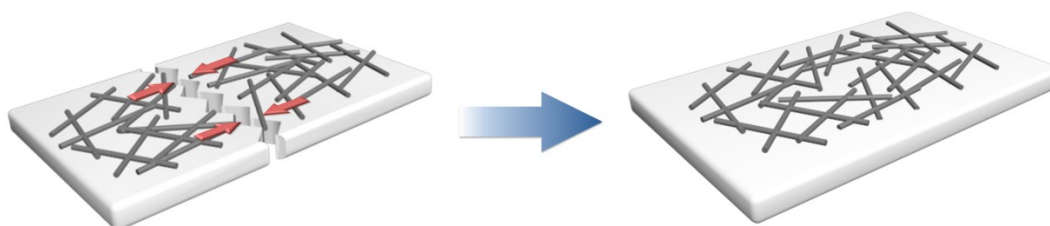

**Fig. S4** Schematic illustration of healing process of CNTs/PU-PCL electrode.

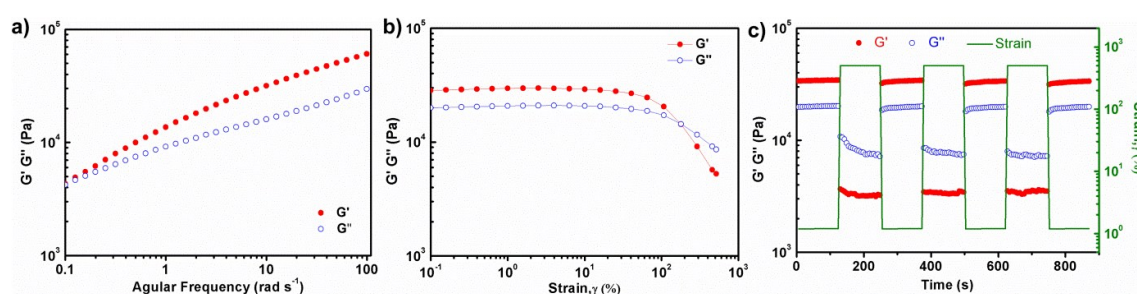

**Fig. S5** Mechanical properties and self-healing behavior of PAA-PEO hydrogels. (a) Frequency-dependent (at a strain of 1%) oscillatory shear rheology of the hydrogel. (b) Strain sweep measurements of PAA-PEO hydrogel at 25 °C (storage modulus  $G'$

and loss modulus  $G''$  as a function of strain  $\gamma$ ). (c) Repeated dynamic strain step tests ( $\gamma = 1\%$  or  $500\%$ ) of PAA-PEO hydrogel at  $25\text{ }^\circ\text{C}$ .

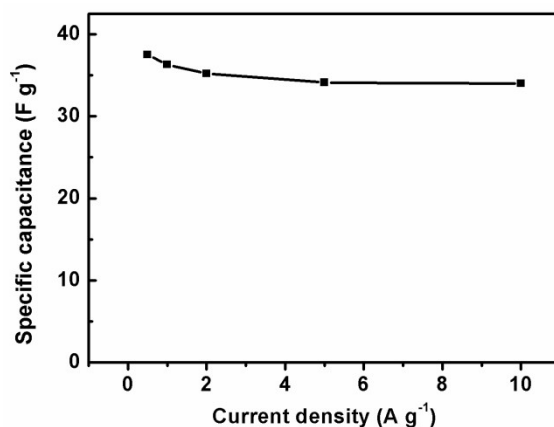

**Fig. S6** Specific capacitance of the supercapacitor at different constant current densities.

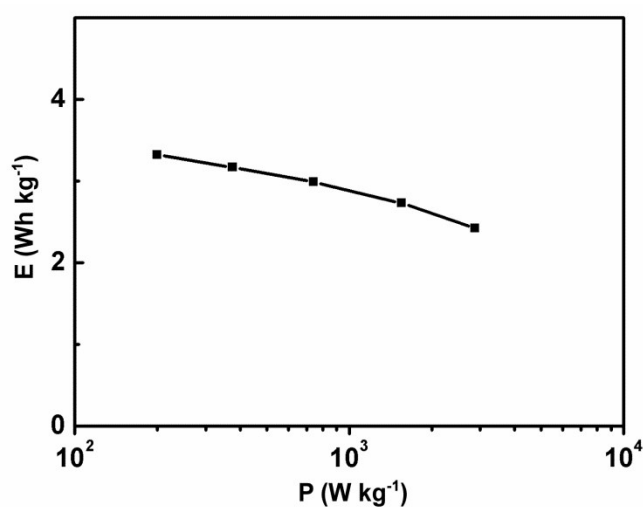

**Fig. S7** The Ragone plot of supercapacitor.

The energy density ( $E$ ,  $\text{Wh kg}^{-1}$ ) and power density ( $P$ ,  $\text{W kg}^{-1}$ ) of the supercapacitor were calculated according to the following equations:

$$E = [(C_{sp} \times \Delta V^2) / 2] \times (1000 / 3600)$$

$$P = E / \Delta t$$

where  $\Delta V$  (V) is the actual voltage excluding IR drop of the discharge process,  $\Delta t$  (s) is the discharge time.

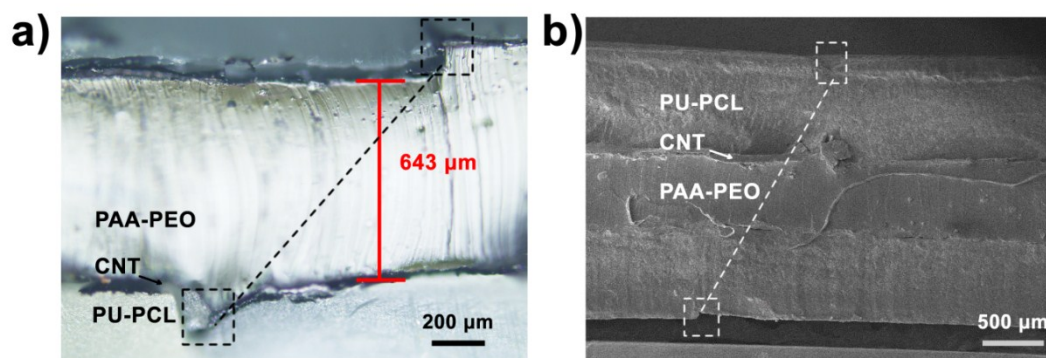

**Fig. S8** (a) Optical microscopic image of the cross-section of the healed supercapacitor. (b) Cross-sectional SEM image of the healed supercapacitor. The dashed line indicates the cut in the original supercapacitor. The squares indicate the defects in the healed region of the supercapacitor

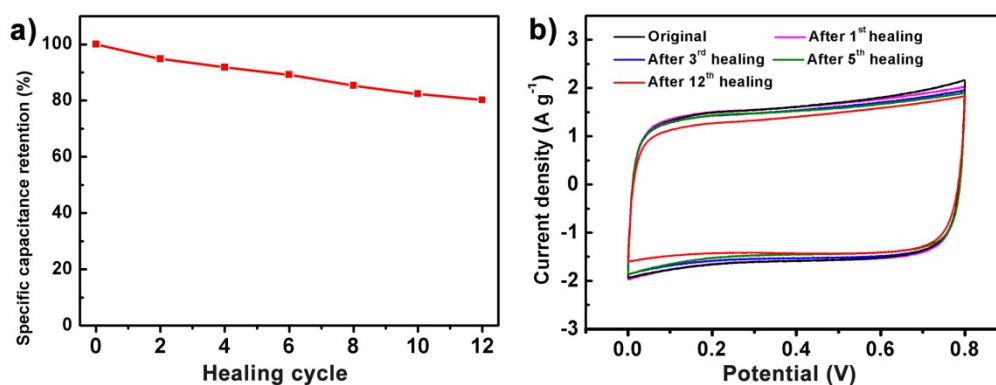

**Fig. S9** Specific capacitance (a) and CV curves (b) of the original supercapacitor before and after different cutting/healing cycles.

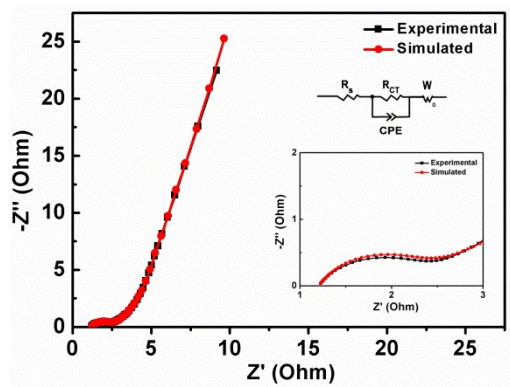

**Fig. S10** Experimental and Simulated Nyquist plots of the original supercapacitor. Inset indicates the equivalent circuit used for simulating the experimental impedance data.

**Table S1** The resistance values for the original supercapacitor and the same supercapacitor after different cutting/healing cycles.

| Sample                        | $R_s$ ( $\Omega$ ) | $R_{ct}$ ( $\Omega$ ) |
|-------------------------------|--------------------|-----------------------|
| Original                      | 1.16               | 1.74                  |
| After 1 <sup>st</sup> healing | 1.41               | 1.99                  |
| After 3 <sup>rd</sup> healing | 1.52               | 2.68                  |
| After 5 <sup>th</sup> healing | 1.64               | 3.16                  |

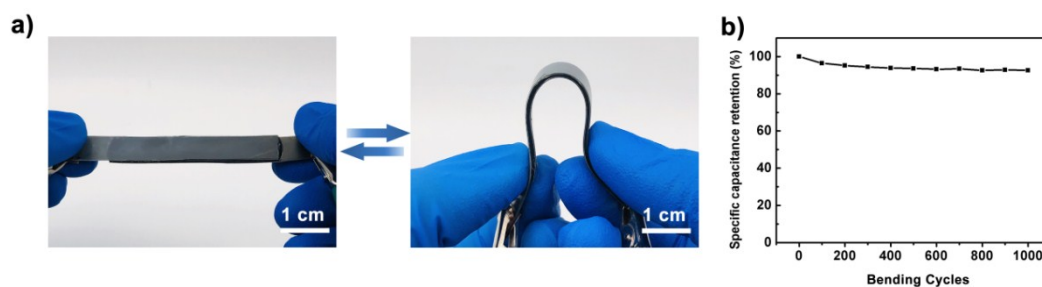

**Fig. S11** (a) Optical images of the original supercapacitor and bent supercapacitor ( $\sim 180^\circ$ ). (b) Specific capacitance retention of the supercapacitor as a function of repeated bending and recovery cycles.
